# Supplementary material for: The physics behind groundwater recession and hydrologically passive mixing volumes
Source: Copernicus journal article supplement (doi:10.5194/hess-2023-112), 2023-05-30
Supplement: Supplementary file 1 [file hess-2023-112-supplement.pdf]

## **Files:**

1. ETNA\_RUN (slx file)

*Double click to open in MATLAB.*

*Put values of  $a_1$ ,  $a_2$ ,  $V_1$ ,  $V_2$  and  $f$  according to your preference in MATLAB window.*

*Example: Put  $a_1=0.0252$ ,  $a_2=0.0079$ ,  $V_1=2356$ ,  $V_2=16032$ ,  $f=0.865$  for Kerrien.*

*Click run.*

*Double click highlighted boxes to view results.*

2. FAST\_STORE (FEM file)

3. SLOW\_STORE (FEM file)

2 and 3 requires licensed FEFLOW 7.0 or above to run.

## **OneDrive Link:**

[3 Items](#)
